# Supplementary material for: Eu3+-doped ionogel-functionalized carbon dot monoliths with bright white photoluminescence
Source: Royal Society of Chemistry journal article supplement (doi:10.1039/c6ra07029a), 2016-01-01
Supplement: c6ra07029a1.pdf [file c6ra07029a1.pdf]

## Supporting information

### Europium<sup>3+</sup>-doped Ionogels-Functionalized Carbon dots

### Monolith with bright white photoluminescence

Bin Dai,<sup>a</sup> Degang Deng<sup>\*a</sup>, Hua Yu<sup>b</sup>, Lei Lei<sup>a</sup>, Yinyan Li<sup>a</sup>, Chenxia Li<sup>a</sup> and Shiqing Xu<sup>\*a</sup>

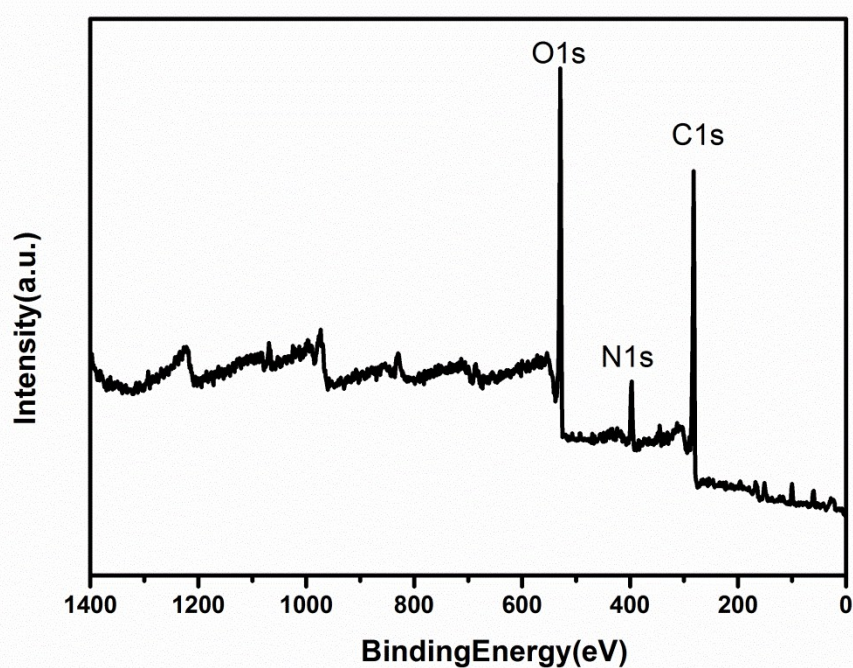

Fig.S1 XPS spectra of CDs.

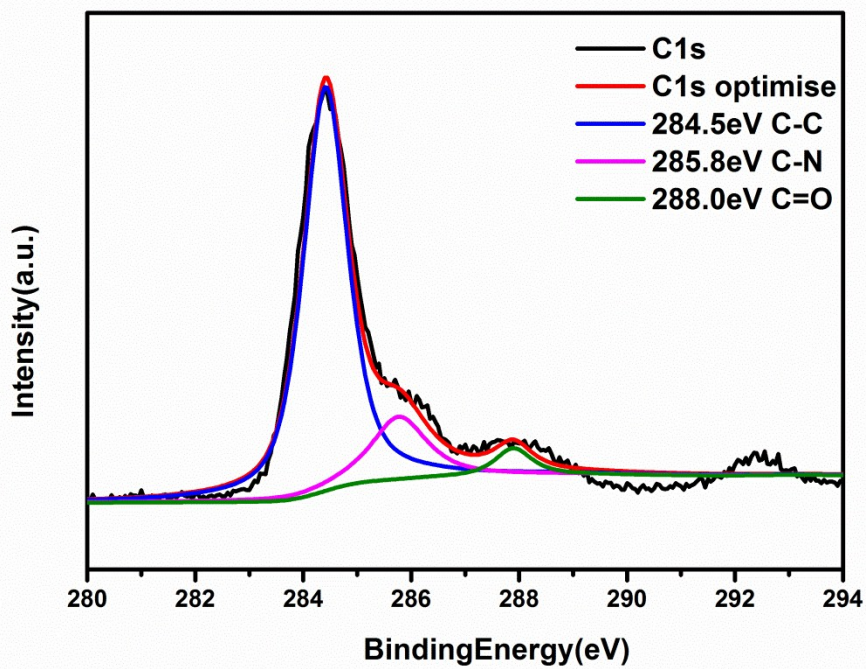

Fig.S2 C1s spectra of as-prepared CDs.

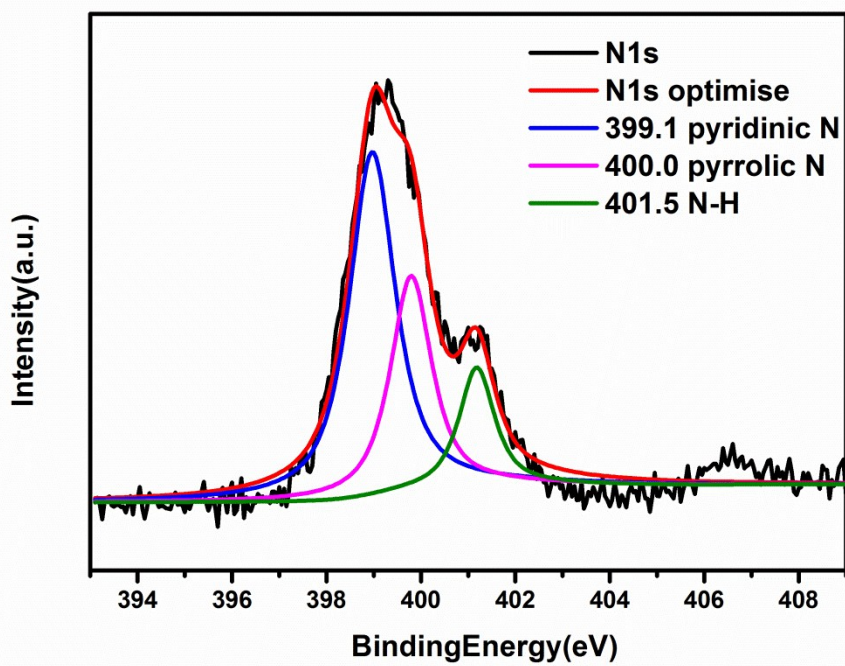

Fig.S3 N1s spectra of as-prepared CDs.

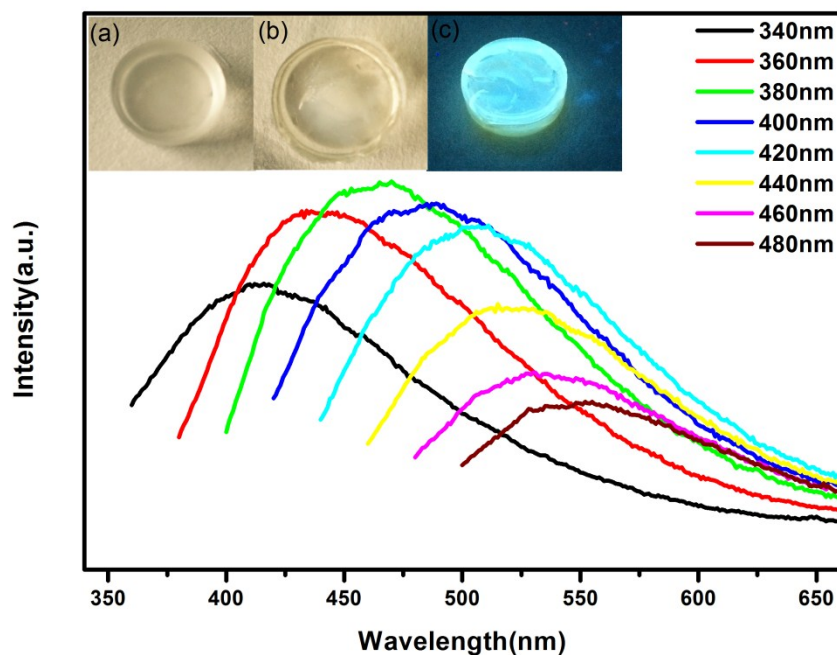

**Fig.S4** PL spectra of the ionogels-functionalized CDs monolith; inset: optical photograph of ionogels monolith(a), ionogels-functionalized CDs monoliths(b) and ionogels-functionalized CDs monoliths upon UV light (365nm) illumination(c).

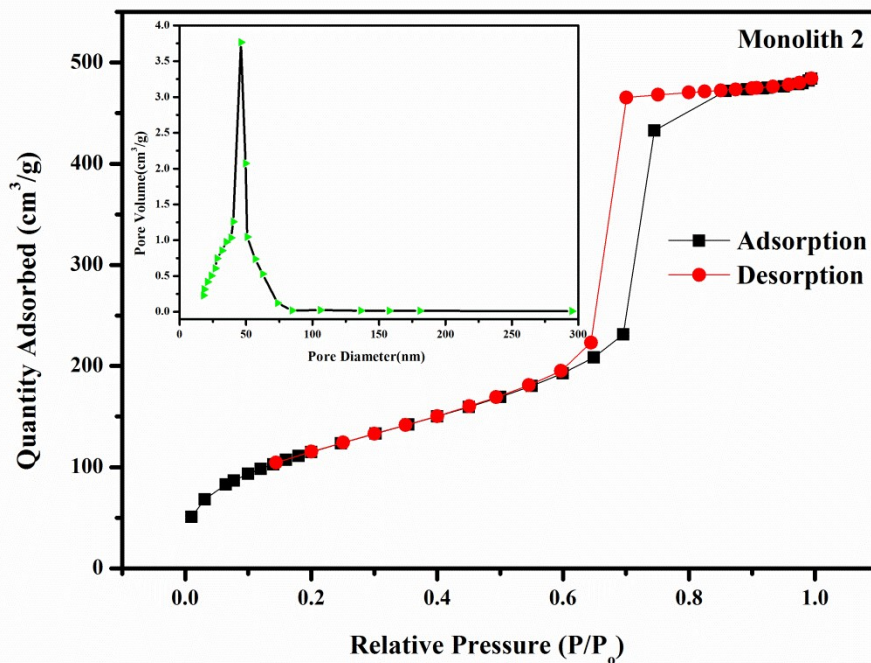

**Fig.S5** N<sub>2</sub> Adsorption–desorption isotherms of the silica-based ionogels monolith 2; inset: corresponding pore size distribution.

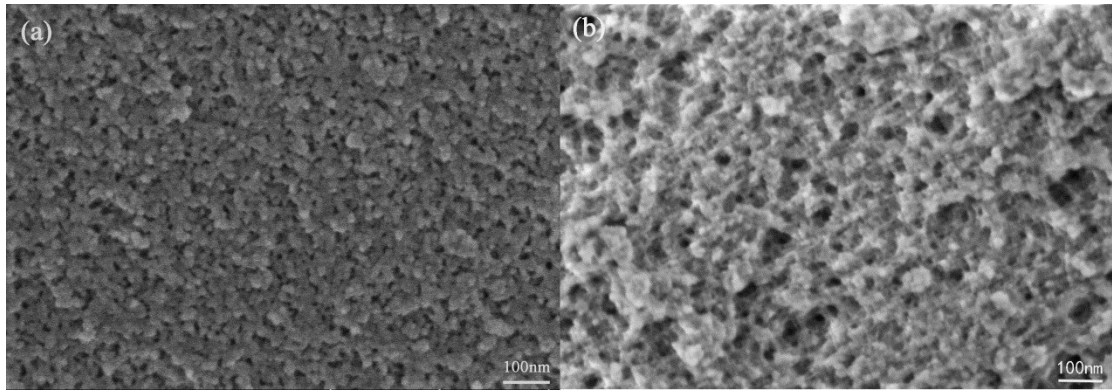

**Fig.S6** (a) SEM of ionogels-functionalized CDs monolith 1; (b) SEM of europium<sup>3+</sup>-doped ionogels-functionalized CDs monolith 1.

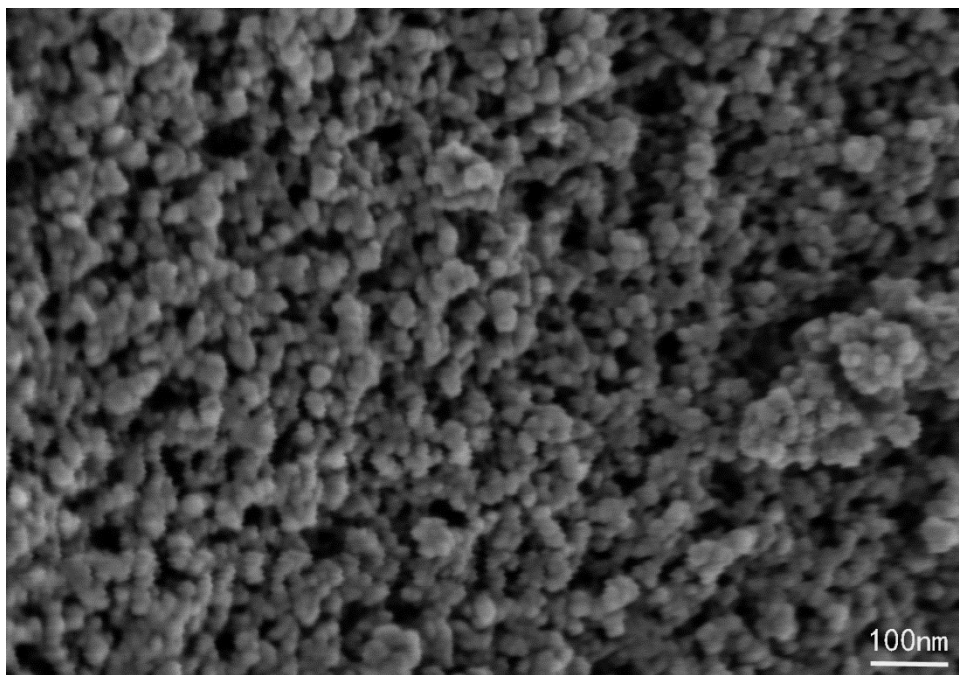

**Fig.S7** SEM image of the ionogels monolith without any dopants.



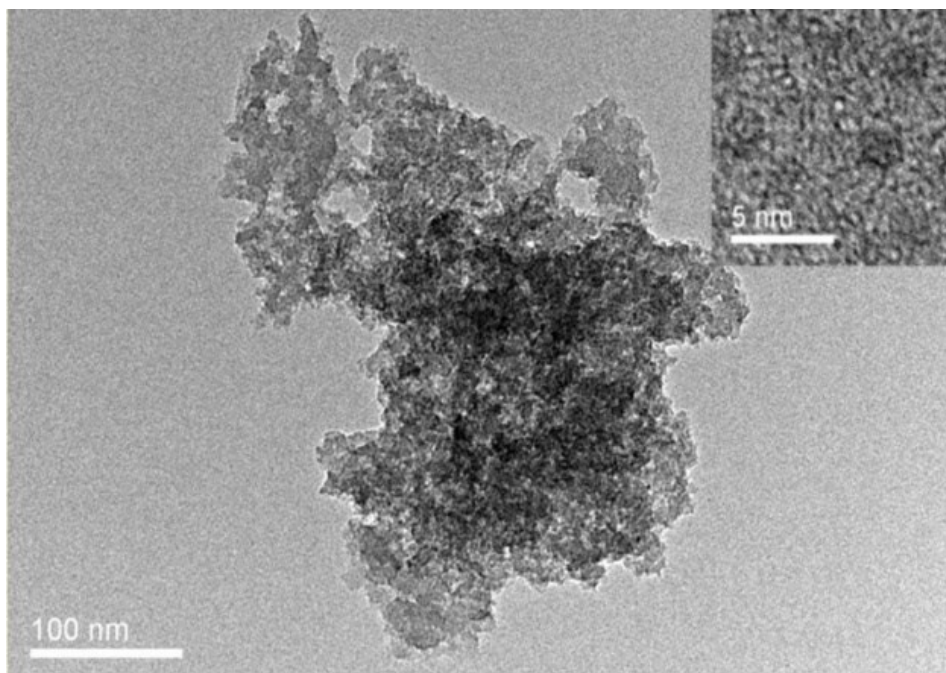

**Fig.S8** TEM images of the ionogels-functionalized CDs monolith. Inset: TEM image of the CDs.

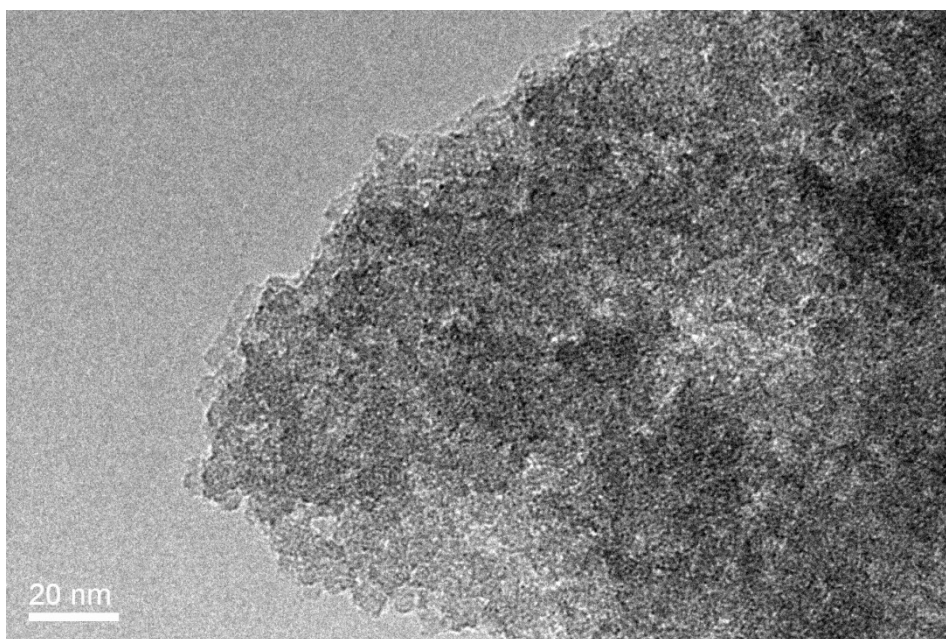

**Fig.S9** TEM images of the ionogels-functionalized CDs monolith.

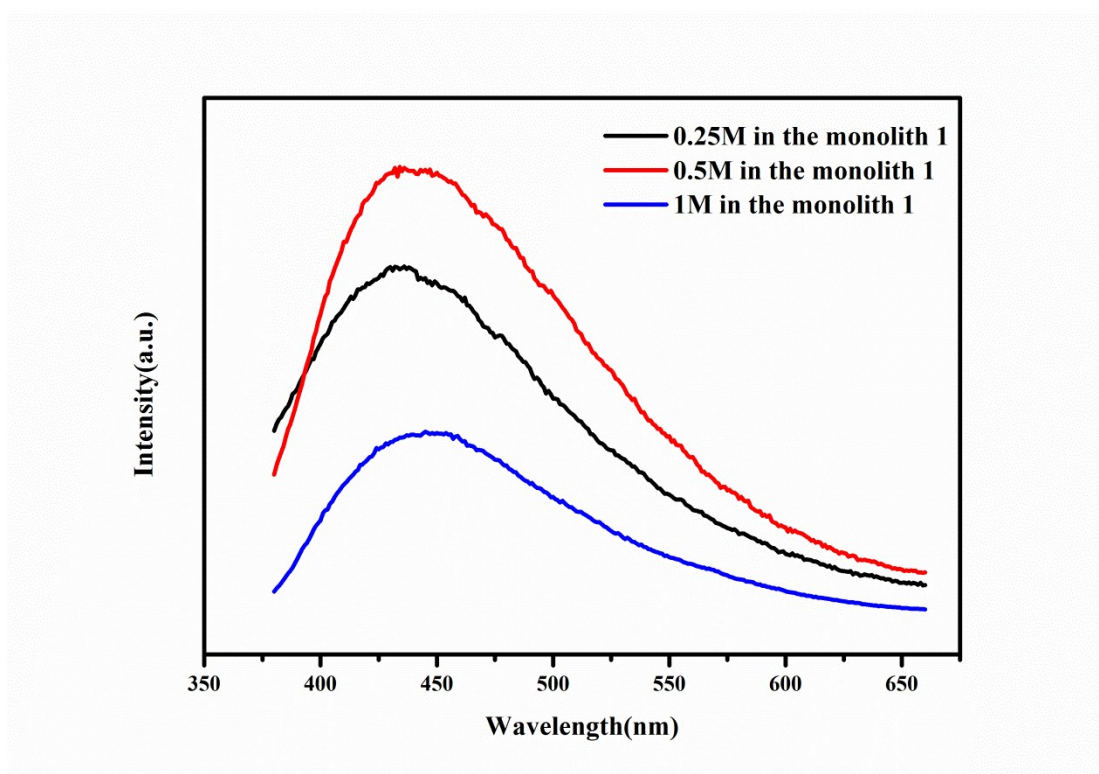

Fig.S10 The emission spectrum of CDs in monolith 1 for different concentration.

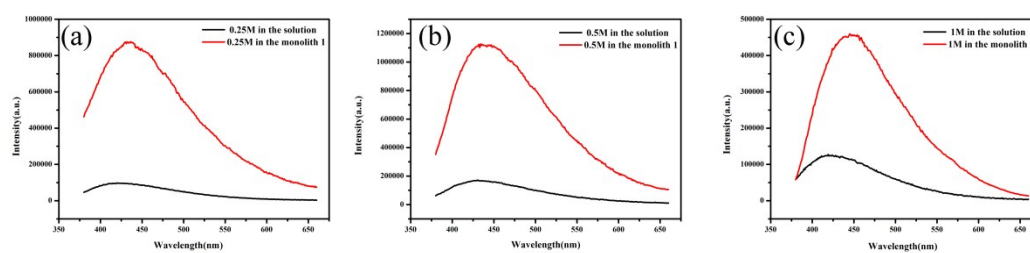

Fig.S11 (a) 0.25M CDs in solution and in the monolith 1, which has around 8 fold enhanced; (b) 0.5M CDs in different environment with around 5 fold enhanced; (c) 1M CDs with around 4 fold enhance after entrapped in the monolith1.



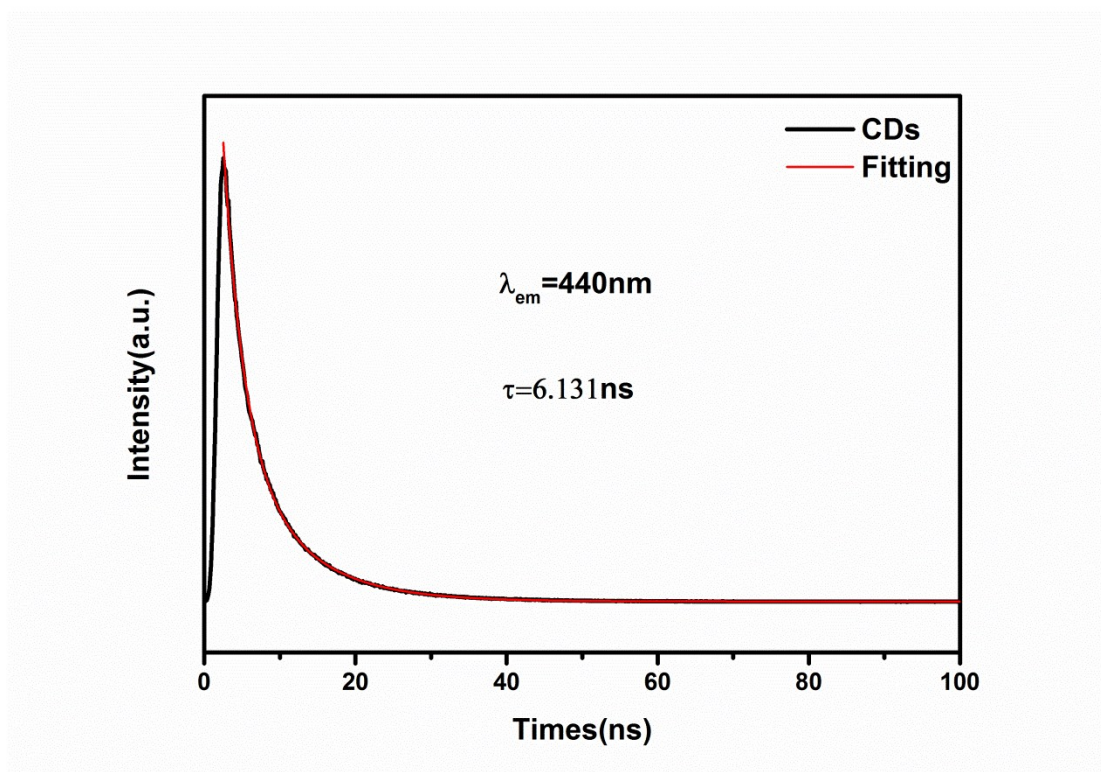

Fig.S12 Fluorescence decay profile of the ionogels-functionalized CDs monolith.

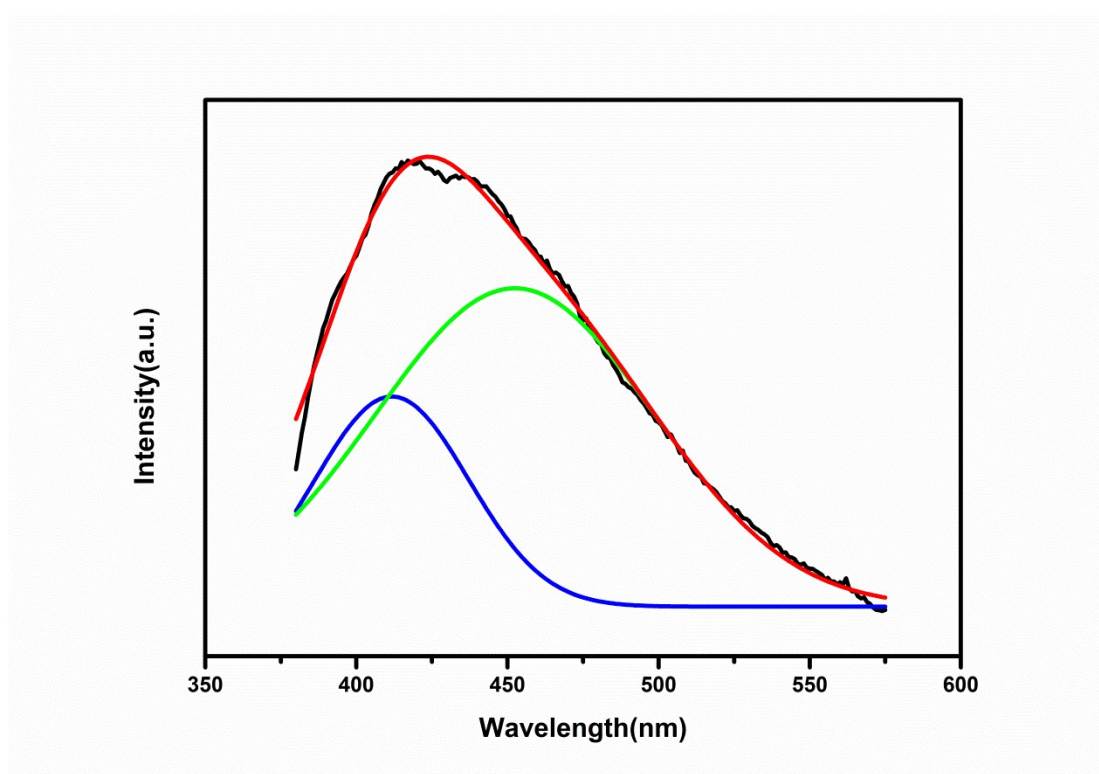

Fig.S13 PL emission of CDs excited by 360nm and fitted by two- Gaussian function which consistent with the fluorescence decay.

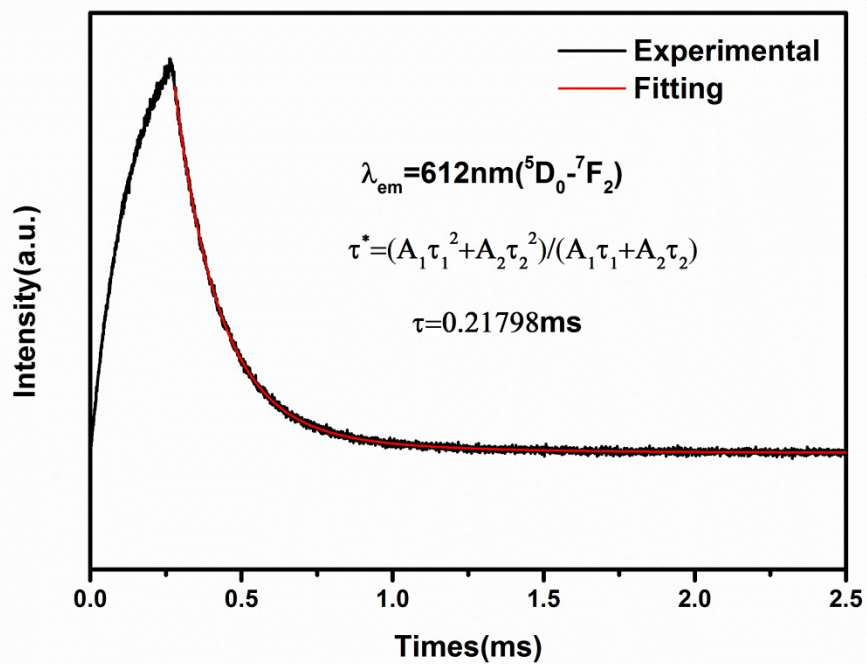

Fig.S14 Fluorescence decay profile of the europium<sup>3+</sup>-doped ionogels-functionalized CDs monoliths monitored at 612nm.

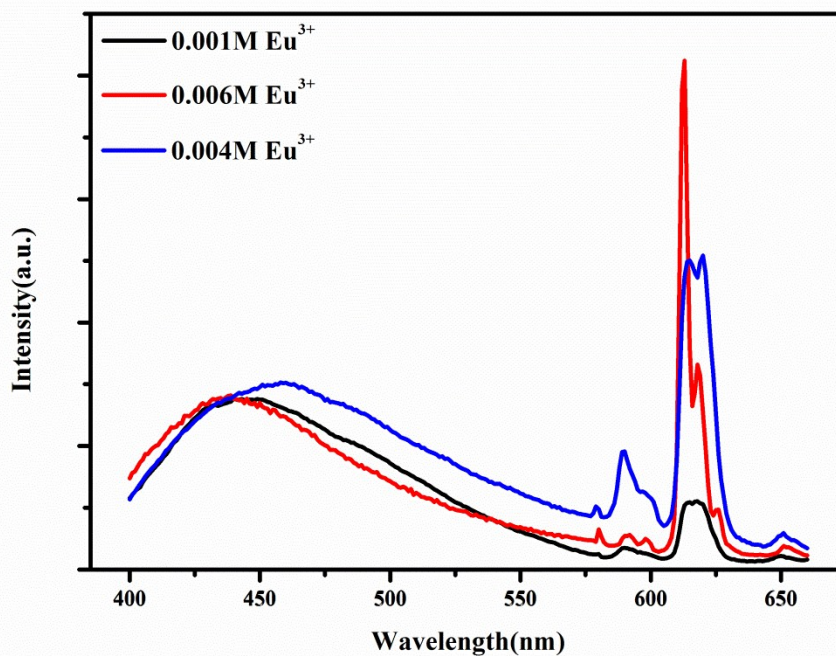

Fig.S15 PL of different concentration Eu<sup>3+</sup>-doped ionogels-functionalized CDs monoliths.
